## Addendum

**Addendum: LP-284, a small molecule acylfulvene, exerts potent antitumor activity in preclinical non-Hodgkin's lymphoma models and in cells deficient in DNA damage repair****Jianli Zhou<sup>1</sup>, Drew Sturtevant<sup>1</sup>, Cassie Love<sup>2</sup>, Aditya Kulkarni<sup>1</sup>, Neha Biyani<sup>1</sup>, Umesh Kathad<sup>1</sup>, Elizabeth Thacker<sup>3</sup>, Sandeep Dave<sup>2</sup> and Kishor Bhatia<sup>1</sup>**<sup>1</sup>Lantern Pharma Inc., Plano, TX 75024, USA<sup>2</sup>Department of Medicine, Duke University, Durham, NC 27708, USA<sup>3</sup>Data Driven Bioscience, Durham, NC 27707, USA**Published:** July 20, 2023**Copyright:** © 2023 Zhou et al. This is an open access article distributed under the terms of the [Creative Commons Attribution License](#) (CC BY 3.0), which permits unrestricted use, distribution, and reproduction in any medium, provided the original author and source are credited.**This article has an addendum:** Wet-lab experiments conducted at Data Driven Bioscience, Rincon Biosciences, Reprocell Inc., intoDNA, and Toxys Europe were funded by Lantern Pharma Inc.Original article: Oncotarget. 2023; 14:597–611. <https://doi.org/10.18632/oncotarget.28454>
